# Supplementary material for: Ultraviolet and blue emitting graphene quantum dots synthesized from carbon nano-onions and their comparison for metal ion sensing
Source: Royal Society of Chemistry journal article supplement (doi:10.1039/c4cc07618d), 2014-11-19
Supplement: c4cc07618d1.pdf [file c4cc07618d1.pdf]

## Supporting Information

### Experimental section

#### Materials

Carbon nano-onions (CNOs) were prepared by thermal annealing of commercially available nanodiamond powders (Nanostructured and Amorphous Materials, Inc., Houston, TX) at 1650 °C for 1h under the flow of Helium in a graphitization furnace. HNO<sub>3</sub> and KOH were purchased from Sigma-Aldrich. All chemicals were used as received without further purification. Dialysis bags were purchased from Spectrum Labs. Deionized water was used throughout the experiment.

#### Synthesis

GQDs were prepared by chemically oxidizing 100 mg of carbon nano-onions (CNOs) in 50 mL of HNO<sub>3</sub> (5 M) at 95 °C, After refluxing for 4h, the solution was cooled down to room temperature and a brownish supernatant was neutralized with KOH. After removing an excessive amount of KNO<sub>3</sub> precipitation formed during the neutralization, the solution was dialyzed to remove ions (dialysis with MWCO=500-1000) for 3 days with constant change of dialysis buffer water. Afterwards, the resultant solution was dialyzed again in another dialysis bag (MWCO=3500) for 1 hour. We found that this process efficiently separate graphene quantum dots (GQDs) into two parts. The solution outside of the dialysis bag (MWCO=3500) exclusively exhibited UV emission and was named GQD-UV. On the other hand, what's left inside the dialysis bag showed spectrally pure blue emission and was named GQD-B.

### **TEM, AFM, XPS, and optical characterizations:**

TEM measurements were conducted on a JEM-2200FS analytical TEM with 200 kV electron acceleration voltage. TEM samples were prepared by placing several drops of GQD solution on a TEM substrate and drying it. Substrates used for the TEM characterization were copper grids coated with lacey carbon. AFM measurements were conducted on Park XE-70 atomic force microscopy with tapping mode. AFM samples were prepared by spin-casting GQDs onto mica substrate. X-ray photoelectron spectroscopic characterizations were conducted by K-Alpha XPS instrument (Thermo Scientific) with 72W Al K $\alpha$  radiation. XPS samples were prepared by drop casting GQD water solutions onto silicon substrate. UV-Vis spectra were obtained using Thermo Scientific Evolution 201 UV-Vis spectrophotometer. Photoluminescence (PL) and photoluminescence excitation (PLE) spectra were obtained using Horiba Scientific FluoroMax-4 spectrofluorometer. All optical measurements were obtained with GQDs dispersed in water which were contained in quartz cuvette with 1 cm path length.

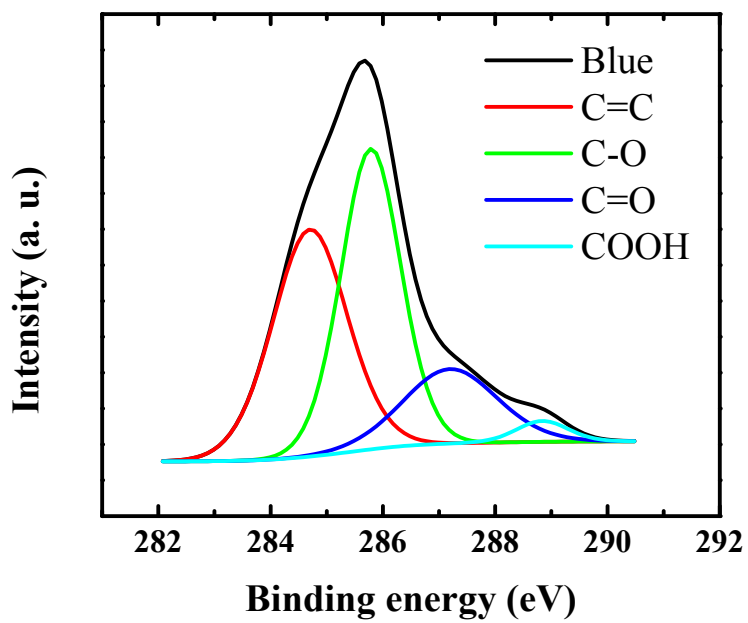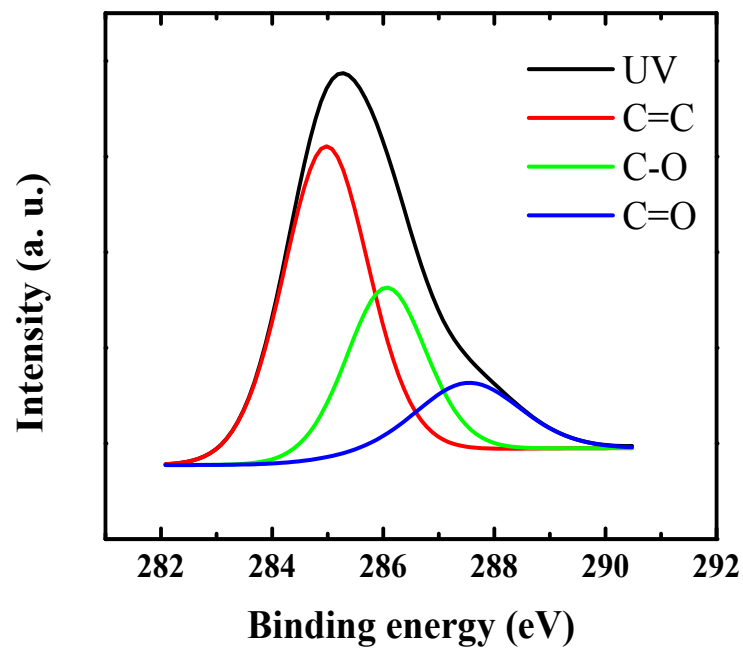

**Fig. 1** XPS high resolution C1s spectra of (left) GQD-B and (right) GQD-UV.

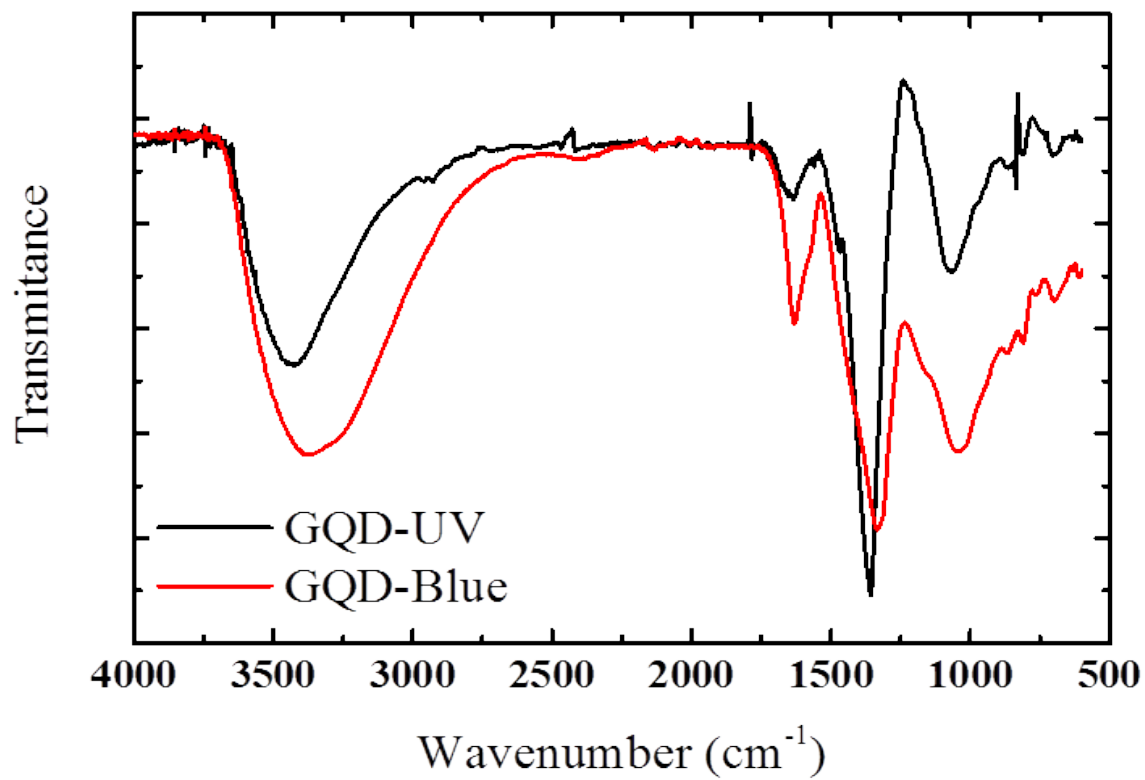

**Fig. 2** FT-IR spectra of GQD-B (red) and GQD-UV (black).

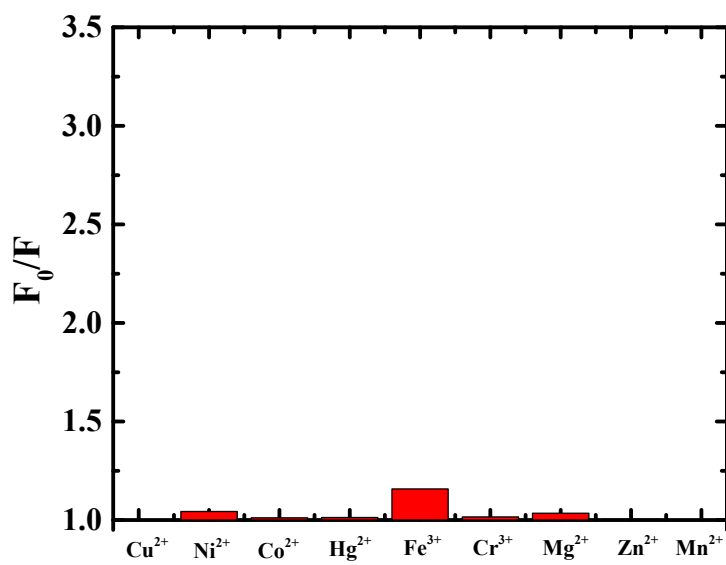

**Fig. 3** Selectivity of GQD-UV for the detection of metal ions. The concentration of metal ions was 50  $\mu\text{M}$ .

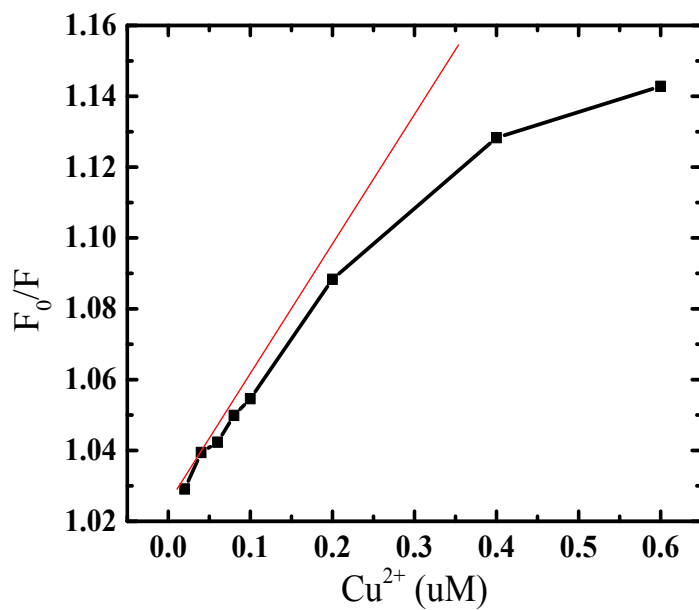

**Fig. 4** The plot of  $F_0/F$  vs.  $\text{Cu}^{2+}$  concentration.  $F_0$  is the fluorescence intensity of GQD-B in the absence of  $\text{Cu}^{2+}$  and  $F$  is the fluorescence intensity of GQD-B in the presence of  $\text{Cu}^{2+}$ . The non-linear relationship of  $F_0/F$  vs.  $\text{Cu}^{2+}$  concentration suggests that collision-induced quenching is not a main mechanism for the fluorescence suppression of GQDs.
